# Supplementary material for: Valorisation of waste to yield recyclable composites of elemental sulfur and lignin
Source: Royal Society of Chemistry journal article supplement (doi:10.1039/c9ta03222c), 2019-01-01
Supplement: c9ta03222c1.pdf [file c9ta03222c1.pdf]

## Electronic Supplementary Information

### Valorisation of Waste to Yield Recyclable Composites of Elemental Sulfur and Lignin

*Menisha S. Karunaratna,<sup>a</sup> Moira K. Lauer,<sup>a</sup> Timmy Thiounn<sup>a</sup>, Rhett C. Smith,<sup>\*a</sup> and Andrew G. Tennyson<sup>\*ab</sup>*

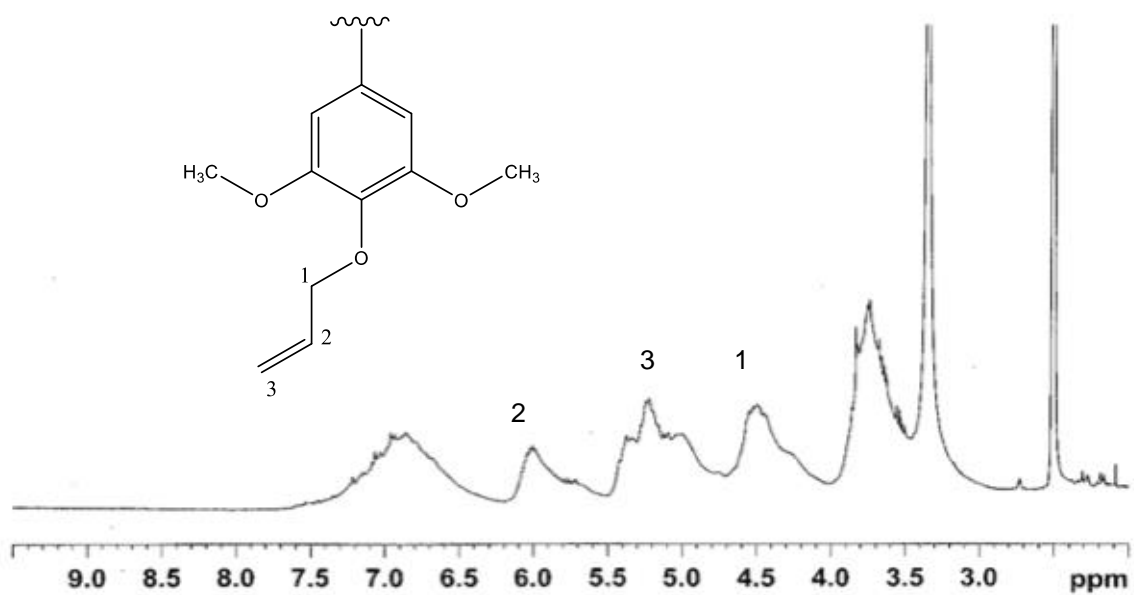

Fig. S1 <sup>1</sup>H NMR Spectrum of allyl lignin.

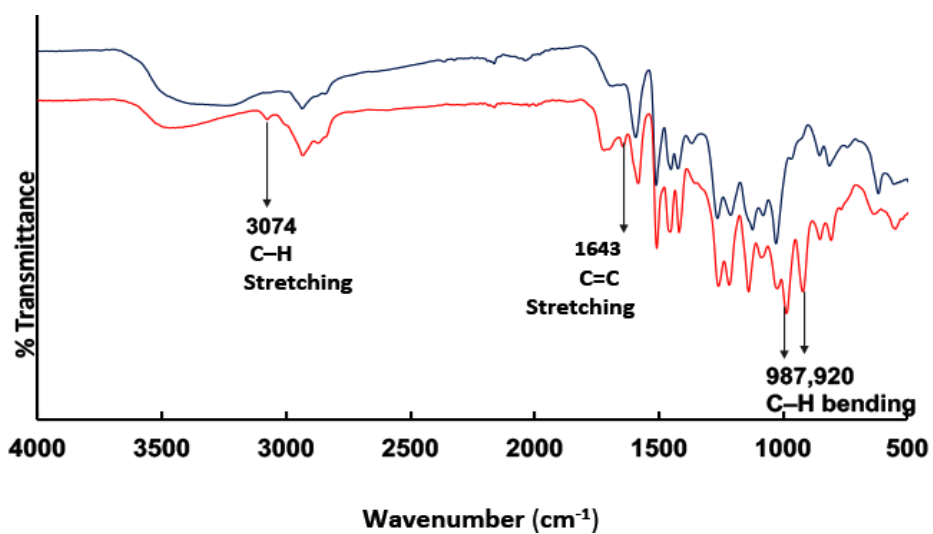

Fig.S2 FTIR spectra of reference (blue color) and allyl lignin (red color)

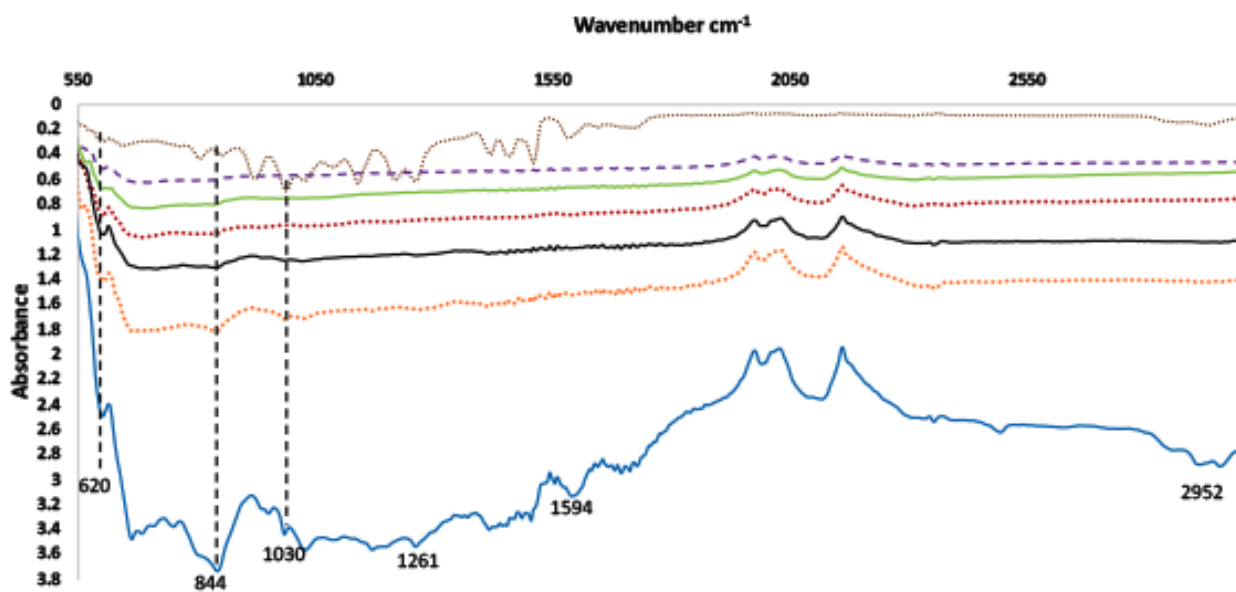

Fig.S3 IR Spectra of composite materials LS<sub>80</sub> (blue solid line), LS<sub>85</sub> (purple dashed line), LS<sub>90</sub> (orange dashed line), LS<sub>95</sub> (black solid line), LS<sub>99</sub> (red dashed line), sulfur (green solid line)

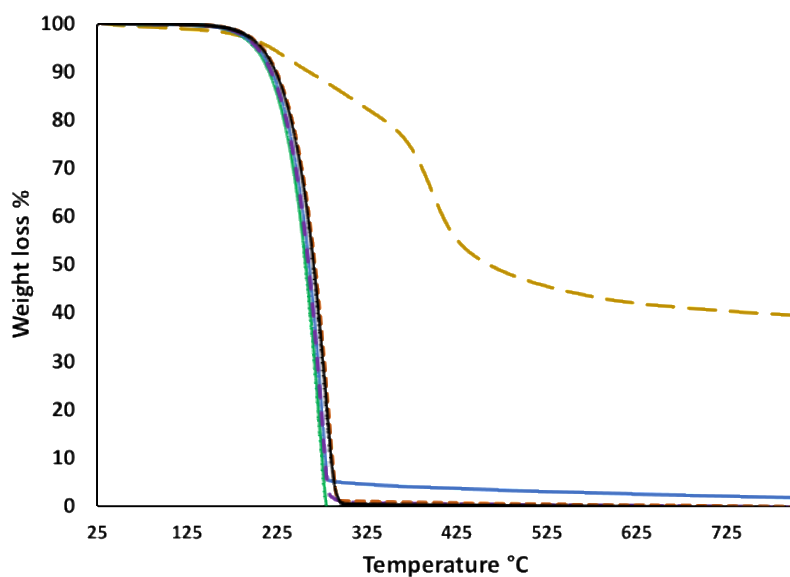

Fig. S4 TGA curves of prepared composite materials. Allyl lignin (yellow dashed line), LS<sub>80</sub> (blue solid line), sulfur (green solid line)

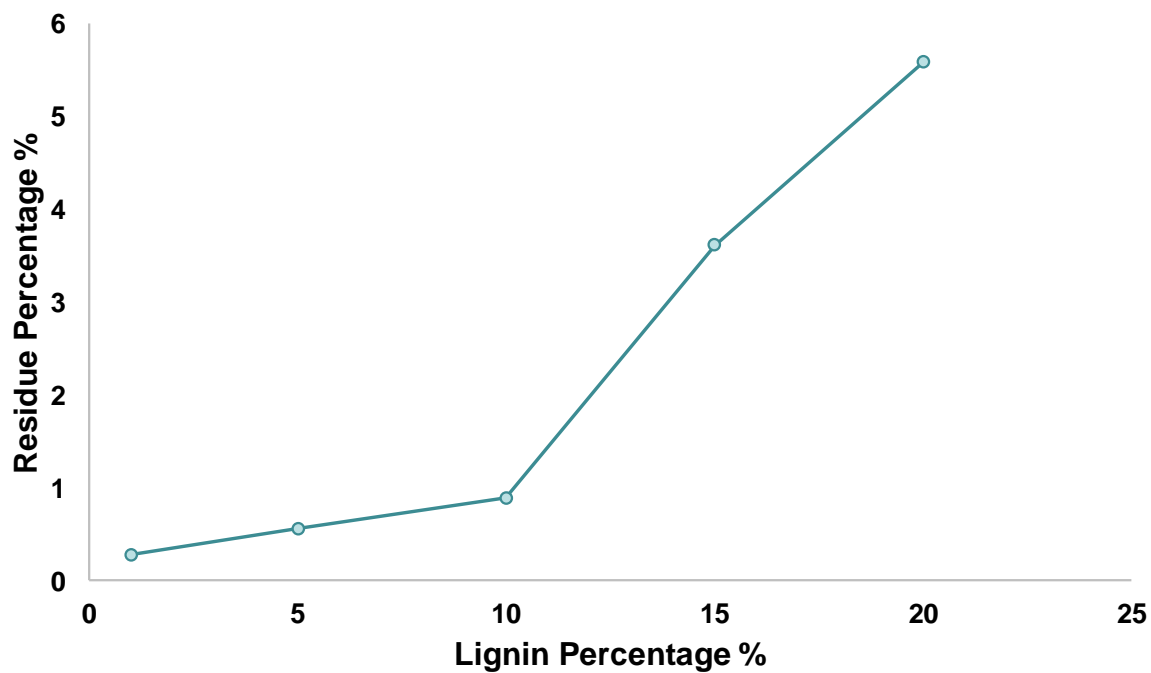

Fig. S5 The graph showing residue percentage remaining after heating to 800 °C in TGA experiments versus the weight percent of lignin in monomer feed

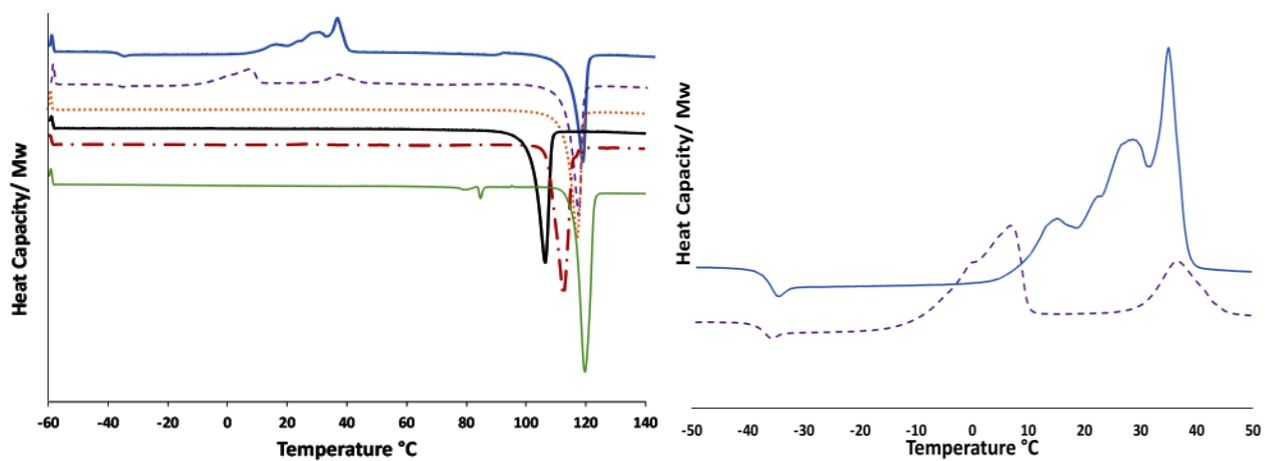

Fig. S6 a) DSC curves of LS<sub>80</sub> (blue solid line), LS<sub>85</sub> (purple dashed line), LS<sub>90</sub> (orange dashed line), LS<sub>95</sub> (black solid line), LS<sub>99</sub> (red dashed line), sulfur (green solid line) b) enlarged view of DSC curves of LS<sub>80</sub> (blue solid line) and LS<sub>85</sub> (purple dashed line) showing T<sub>g</sub> and cold crystallization peaks.

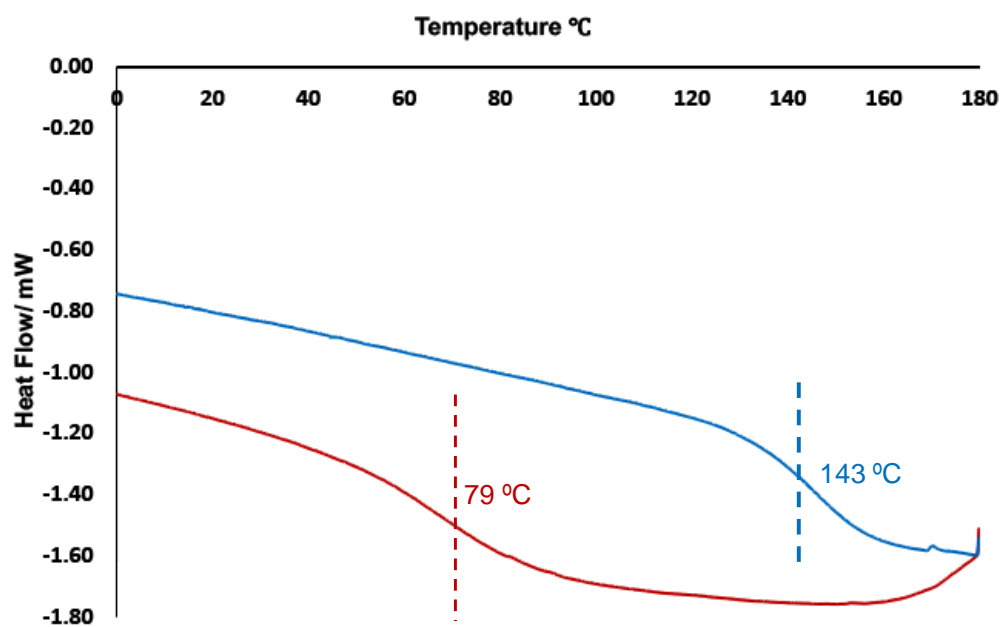

Fig. S7 DSC data for allyl lignin (red line) and reference lignin (blue line). The  $T_g$  values are marked for clarity.

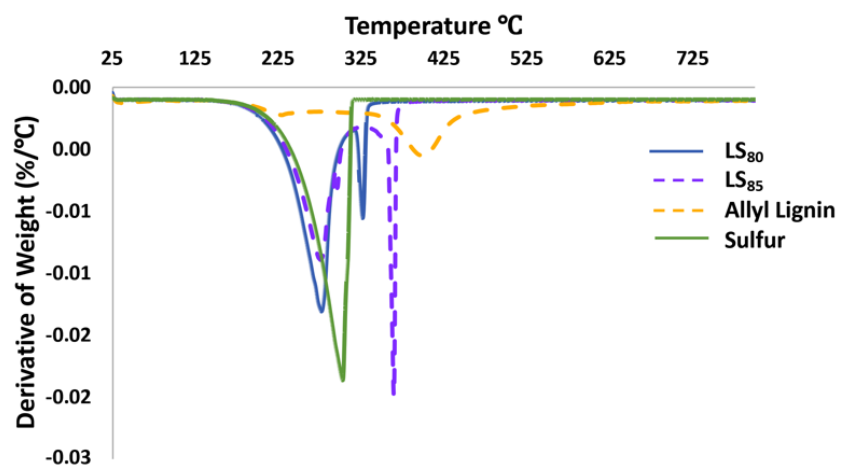

Fig. S8 DGA curves for data presented in Figure 3 of the manuscript
